# Supplementary material
Source: PubMed Central journal article supplement (PMC3362879)
Supplement: supp_111.187237_JPET187237_Supp_Fig1.pdf [file supp_111.187237_JPET187237_Supp_Fig1.pdf]

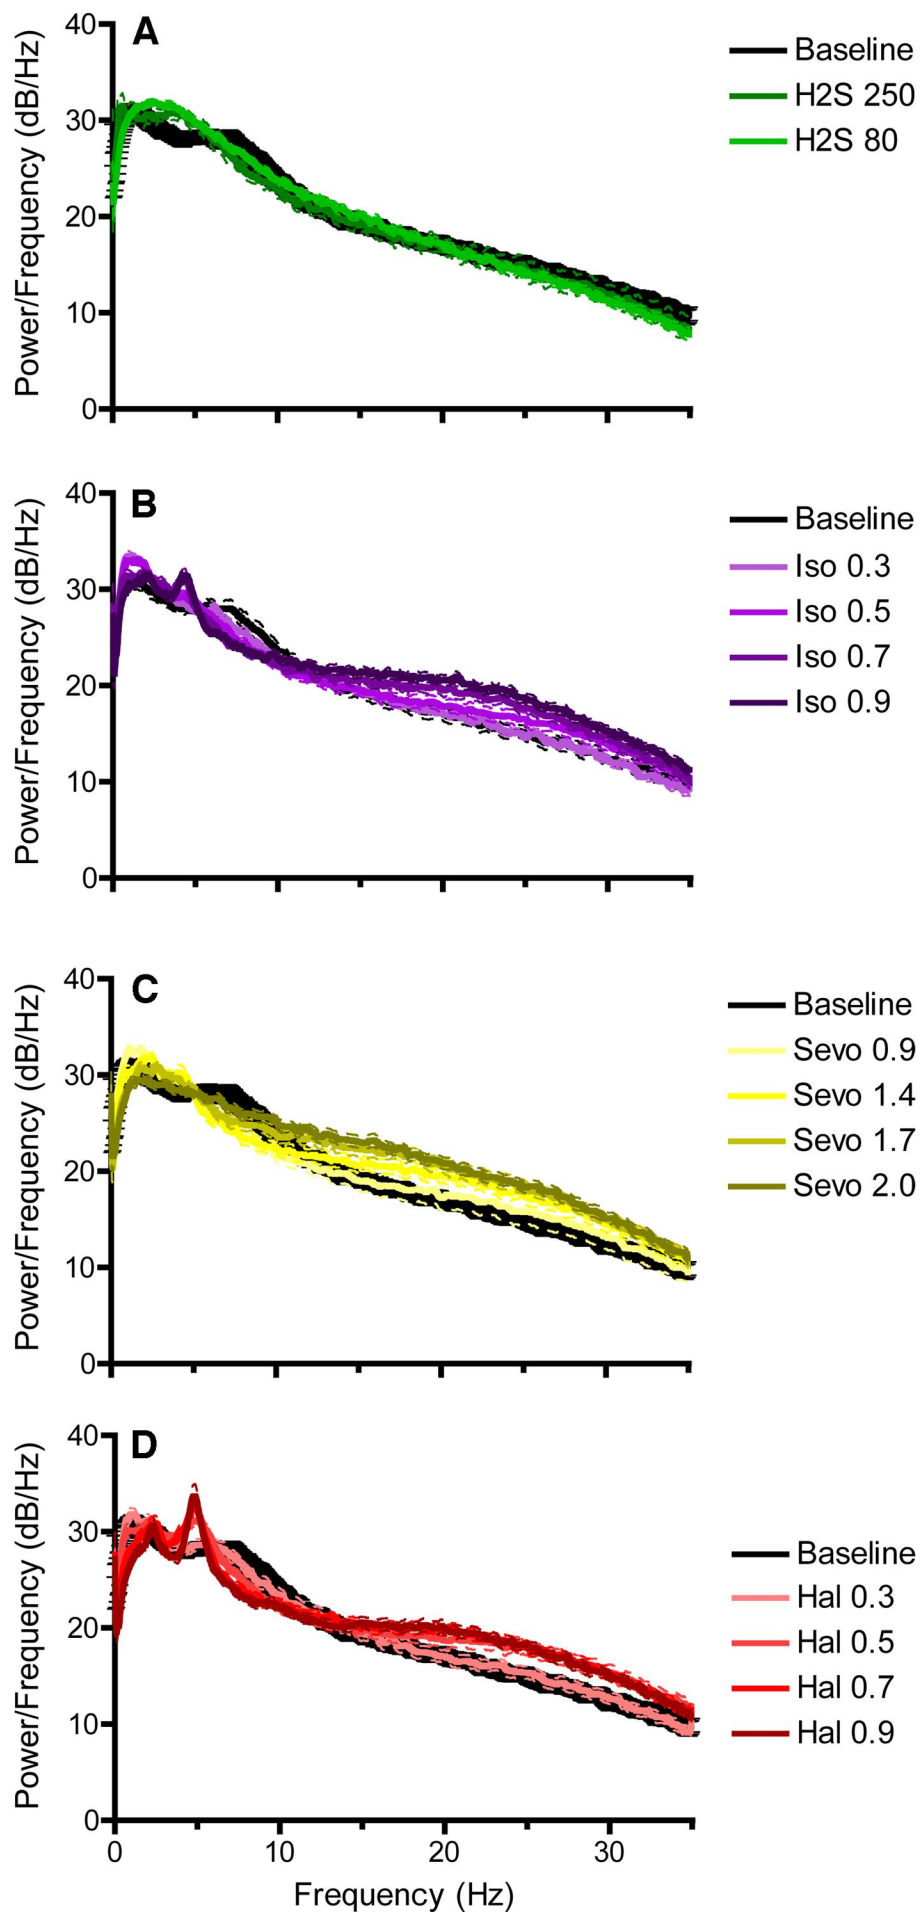

**Supplemental Figure 1.** Normalized power spectra for hydrogen sulfide (A), isoflurane (B), sevoflurane (C), and halothane (D) all shown with the same baseline segments taken during wakefulness
